# Supplementary material
Source: Copernicus journal article supplement (doi:10.5194/essd-2026-173)
Supplement: Supplementary file 1 [file essd-2026-173-supplement.pdf]

## Supplementary Information

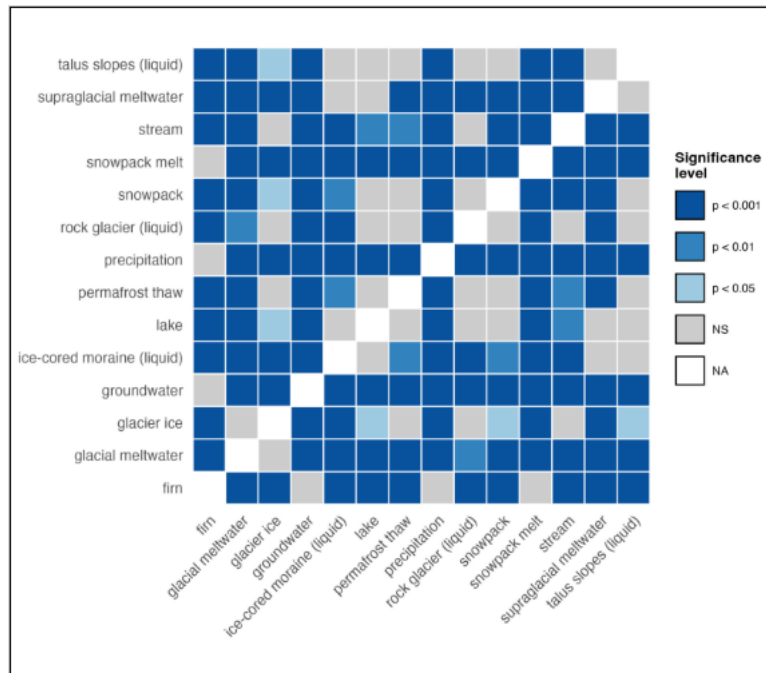

Figure S1. Pairwise statistical comparison among cryosphere-related hydrological endmembers showing levels of significance for differences in isotopic composition between water types. Each cell represents the result of a post-hoc test between two endmembers, with colour intensity indicating significance level (dark blue:  $p < 0.001$ ; medium blue:  $p < 0.01$ ; light blue:  $p < 0.05$ ; grey: not significant; white: not available). The matrix highlights which endmembers are isotopically distinct versus those showing overlapping signatures across glacierized catchment components.

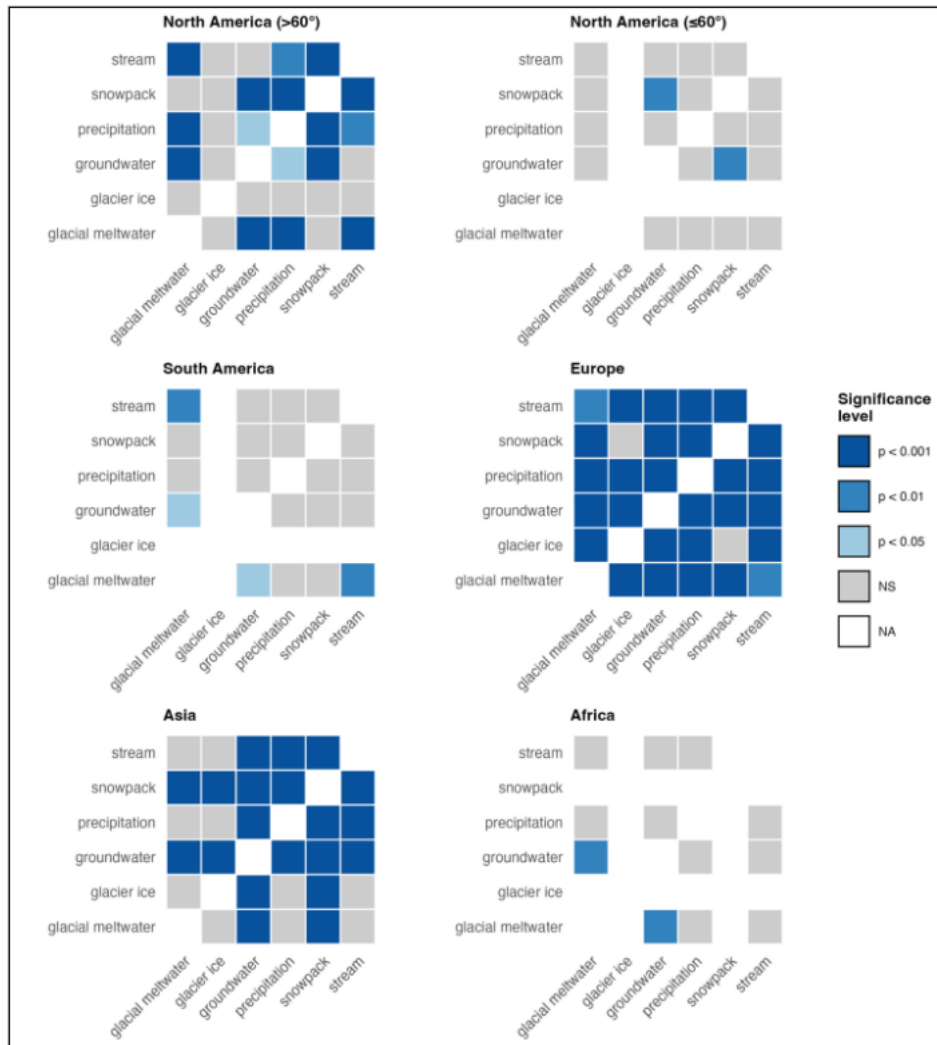

Figure S2. Regional pairwise statistical comparison of  $\delta^{18}\text{O}$  values among major hydrological and cryosphere endmembers across North America ( $>60^\circ$  and  $\leq 60^\circ$ ), South America, Europe, Asia, and Africa. Heatmaps display significance levels from post-hoc tests evaluating isotopic differences between endmembers, with darker colours indicating stronger statistical separation ( $p < 0.001$  to  $p < 0.05$ ), grey representing non-significant results, and white indicating unavailable data.

Table S1. References used to build the database

| DOI                                     | citation                                                                                                                                                                                                                                                                                                                                                                  |
|-----------------------------------------|---------------------------------------------------------------------------------------------------------------------------------------------------------------------------------------------------------------------------------------------------------------------------------------------------------------------------------------------------------------------------|
| doi.org/10.1007/s11069-016-2203-6       | Ahluwalia, R. S., Rai, S. P., Gupta, A. K., Dobhal, D. P., Tiwari, R. K., Garg, P. K., & Kesharwani, K. (2016). Towards the understanding of the flash flood through isotope approach in Kedarnath valley in June 2013, Central Himalaya, India. <i>Natural Hazards</i> , 82, 321-332.                                                                                    |
| doi.org/10.5194/hess-21-5089-2017       | Ala-Aho, P., Tetzlaff, D., McNamara, J. P., Laudon, H., & Soulsby, C. (2017). Using isotopes to constrain water flux and age estimates in snow-influenced catchments using the STARR (Spatially distributed Tracer-Aided Rainfall–Runoff) model. <i>Hydrology and Earth System Sciences</i> , 21, 5089–5110.                                                              |
| doi.org/10.5194/hess-29-2219-2025       | Amschwand, D., Tschann, S., Scherler, M., Hoelzle, M., Krummenacher, B., Haberkorn, A., ... Gubler, H. (2025). Seasonal ice storage changes and meltwater generation at Murtèl rock glacier (Engadine, eastern Swiss Alps): estimates from measurements and energy budgets in the coarse blocky active layer. <i>Hydrology and Earth System Sciences</i> , 29, 2219–2253. |
| doi.org/10.1017/aog.2017.11             | Appleby, J.R., Brook, M.S., Horton, T.W., Fuller I.C., Holt K.A. & Quincey D.J. 2017. Stable isotope (dD-d18O) relationships of ice facies and glaciological structures with the mid-latitude maritime Fox Glacier, New Zealand. <i>Annals of Glaciology</i> 58 (72-2), doi: 10.1017/aog.2017.11                                                                          |
| doi.org/10.1002/hyp.10386               | Baraer, M, McKenzie, J, Mark, BG, Gordon, R, Bury, J, Condom, T, Gomez, J, Knox, S, and Fortner, SK (2015), Contribution of groundwater to the outflow from ungauged glacierized catchments: a multi-site study in the tropical Cordillera Blanca, Peru. <i>Hydrological Processes</i> , 29, 2561–2581. doi: 10.1002/hyp.10386.                                           |
| doi.org/10.3389/feart.2021.727575       | Barkdull, N. S., Carling, G. T., Fernandez, D. P., Nelson, S. T., Bickmore, B. R., Tingey, D. G., ... & Hale, C. A. (2021). Glaciers control the hydrogeochemistry of proglacial streams during late summer in the Wind River Range, Wyoming, United States. <i>Frontiers in Earth Science</i> , 9, 727575.                                                               |
| doi.org/10.1016/j.scitotenv.2023.162777 | Bearzot, F., Colombo, N., Cremonese, E., di Cella, U. M., Drigo, E., Caschetto, M., ... & Rossini, M. (2023). Hydrological, thermal and chemical influence of an intact rock glacier discharge on mountain stream water. <i>Science of The Total Environment</i> , 876, 162777.                                                                                           |
| doi.org/10.1016/j.jhydrol.2019.123983   | Boral, S., Sen, I. S., Ghosal, D., Peucker-Ehrenbrink, B., & Hemingway, J. D. (2019). Stable water isotope modeling reveals spatio-temporal variability of glacier                                                                                                                                                                                                        |

|                                            |                                                                                                                                                                                                                                                                                                                                  |
|--------------------------------------------|----------------------------------------------------------------------------------------------------------------------------------------------------------------------------------------------------------------------------------------------------------------------------------------------------------------------------------|
|                                            | meltwater contributions to Ganges River headwaters. <i>Journal of Hydrology</i> , 577, 123983.                                                                                                                                                                                                                                   |
| doi.org/10.5194/tc-14-4145-2020            | Bouchard, Émilie, 2016. CHARACTERIZATION OF HYDROLOGICAL PROCESSES OF A GLACIARIZED WATER<br>Chesnokova, A., M. Baraer, E. Bouchard, 2020. Proglacial icings as records of winter hydrological processes. <i>The Cryosphere</i> , 14 4145-4164                                                                                   |
| doi.org/10.1002/hyp.13533                  | Brighenti, S., Tolotti, M., Bruno, M. C., Engel, M., Wharton, G., Cerasino, L., ... & Bertoldi, W. (2019). After the peak water: the increasing influence of rock glaciers on alpine river systems. <i>Hydrological Processes</i> , 33(21), 2804-2823.                                                                           |
| doi.org/10.5194/hess-29-6479-2025          | Charonnat, B., Baraer, M., Valence, E., Masse-Dufresne, J., Monty, C., Wang, K., Devoie, E., and McKenzie, J. M.: The influence of a rock glacier on the riverbed hydrological system, <i>EGU sphere</i> [preprint], <a href="https://doi.org/10.5194/egusphere-2025-117">https://doi.org/10.5194/egusphere-2025-117</a> , 2025. |
| doi.org/10.5194/tc-14-4145-2020            | Chesnokova, A., M. Baraer, E. Bouchard, 2020. Proglacial icings as records of winter hydrological processes. <i>The Cryosphere</i> , 14 4145-4164                                                                                                                                                                                |
| doi.org/10.1201/9781482242911              | Clark, I. D., & Fritz, P. (1997). <i>Environmental Isotopes in Hydrogeology</i> . CRC Press.                                                                                                                                                                                                                                     |
| doi.org/10.3389/frwa.2025.1569267          | Coombs, M., Carling, G. T., Munk, L., Jenckes, J., Bickmore, B. R., Rey, K. A., ... & Gomez, T. Water Chemistry of Alaskan Glacial Rivers is Affected by Glacier Coverage, Bedrock Type, and Groundwater Inputs. <i>Frontiers in Water</i> , 7, 1569267.                                                                         |
| doi.org/10.1126/science.133.3465.1702      | Craig, H. (1961). Isotopic variations in meteoric waters. <i>Science</i> , 133, 1702–1703.                                                                                                                                                                                                                                       |
| doi.org/10.1016/B978-0-323-99931-1.00047-7 | Curry, A. M. (2023). Talus slopes. In <i>Reference Module in Earth Systems and Environmental Sciences</i> . Elsevier.                                                                                                                                                                                                            |
| doi.org/10.3402/tellusa.v16i4.8993         | Dansgaard, W. (1964). Stable isotopes in precipitation. <i>Tellus</i> , 16, 436–468.                                                                                                                                                                                                                                             |
| n/a                                        | Fierz, C., Armstrong, R. L., Durand, Y., Etchevers, P., Greene, E., McClung, D. M., ... Sokratov, S. A. (2009). The International Classification for Seasonal Snow on the Ground. UNESCO-IHP.                                                                                                                                    |
| doi.org/10.1016/j.chemgeo.2023.121368      | Gatesman, T. A., Liljedahl, A. K., Douglas, T. A., Debolskiy, M. V., Trainor, T. P., & Gädeke, A. (2023). Glacier contribution to lowland streamflow: A multi-year, daily geochemical hydrograph separation study in subarctic Alaska. <i>Chemical Geology</i> , 621, 121368.                                                    |
| doi.org/10.1002/                           | Gibson, J. J., Edwards, T. W. D., Burse, G. G., & Prowse, T. D. (2002). Evaporative enrichment in lakes: Implications for isotope-based hydrograph separation. <i>Hydrological Processes</i> , 16, 203–218.                                                                                                                      |

|                                       |                                                                                                                                                                                                                                                                                                       |
|---------------------------------------|-------------------------------------------------------------------------------------------------------------------------------------------------------------------------------------------------------------------------------------------------------------------------------------------------------|
| doi.org/10.1016/j.jhydrol.2015.01.013 | Gordon, R. P., Lautz, L. K., McKenzie, J. M., Mark, B. G., Chávez, D., & Baraer, M. (2015). Sources and pathways of stream generation in tropical proglacial valleys of the Cordillera Blanca, Peru. <i>Journal of Hydrology</i> , 522, 628-644.                                                      |
| doi.org/10.1016/j.ejrh.2016.10.002    | Guido, Z., McIntosh, J. C., Papuga, S. A., & Meixner, T. (2016). Seasonal glacial meltwater contributions to surface water in the Bolivian Andes: A case study using environmental tracers. <i>Journal of Hydrology: Regional Studies</i> , 8, 260-273.                                               |
| doi.org/10.1080/10256010801887174     | Horita, J., Rozanski, K., & Cohen, S. (2008). Isotope effects in the evaporation of water: A status report. <i>Reviews in Mineralogy and Geochemistry</i> , 66, 1–36.                                                                                                                                 |
| doi.org/10.1016/S0169-555X(00)00022-2 | Humlum, O. (2000). The geomorphic significance of rock glaciers: estimates of rock glacier debris volumes and headwall recession rates in West Greenland. <i>Geomorphology</i> , 35, 41–67.                                                                                                           |
| doi.org/10.1126/science.1183188       | Immerzeel, W. W., van Beek, L. P. H., & Bierkens, M. F. P. (2010). Climate change will affect the Asian water towers. <i>Science</i> , 328, 1382–1385.                                                                                                                                                |
| doi.org/10.1016/S0022-1694(03)00258-0 | Jansson, P., Hock, R., & Schneider, T. (2003). The concept of glacier storage: A review. <i>Journal of Hydrology</i> , 282, 116–129.                                                                                                                                                                  |
| doi.org/10.1038/ngeo2943              | Jasechko, S. (2017). Global aquifers dominated by fossil groundwaters but wells vulnerable to modern contamination. <i>Nature Geoscience</i> , 10, 425–429.                                                                                                                                           |
| doi.org/10.1002/hyp.217               | Kendall, C., & Coplen, T. B. (2001). Distribution of oxygen-18 and deuterium in river waters across the United States. <i>Hydrological Processes</i> , 15, 1363–1393.                                                                                                                                 |
| doi.org/10.1029/2019JD030492          | Kong, Y., Wang, K., Pu, T., Shi, X., 2019. Nonmonsoon Precipitation Dominates Groundwater Recharge Beneath a Monsoon-Affected Glacier in Tibetan Plateau. <i>Journal of Geophysical Research: Atmospheres</i> 124, 10913–10930.                                                                       |
| doi.org/10.1007/s10040-023-02639-0    | Kong, Y., Pu, T., Wang, K., Shi, X., Ren, Y., Zhang, W., Pang, Z., Cuntz, M., 2023. Ambiguity in the altitude effect of precipitation isotopes for estimating groundwater recharge elevation and paleoelevation reconstruction in the leeward side of a mountain. <i>Hydrogeol. J.</i> 31, 1259–1270. |
| doi.org/10.1016/j.quaint.2014.08.046  | Li, Z., Gao, Y., Wang, Y., Pan, Y., Li, J., Chen, A., Wang, T., Han, C., Song, Y., Theakstone, W.H., 2015. Can monsoon moisture arrive in the Qilian Mountains in summer? <i>Quat. Int.</i> 358, 113–125.                                                                                             |
| doi.org/10.1016/j.quaint.2015.02.013  | Li, Zongxing, Feng, Q., Liu, W., Wang, T., Guo, X., Li, Zongjie, Gao, Y., Pan, Y., Guo, R., Jia, B., Song, Y.,                                                                                                                                                                                        |

|                                                                                             |                                                                                                                                                                                                                                                                                     |
|---------------------------------------------------------------------------------------------|-------------------------------------------------------------------------------------------------------------------------------------------------------------------------------------------------------------------------------------------------------------------------------------|
|                                                                                             | Han, C., 2015. The stable isotope evolution in Shiyi glacier system during the ablation period in the north of Tibetan Plateau, China. <i>Quat. Int.</i> 380, 262–271.                                                                                                              |
| <a href="https://doi.org/10.5194/hess-28-2239-2024">doi.org/10.5194/hess-28-2239-2024</a>   | Liu, F., Conklin, M. H., & Shaw, G. D. (2024). Elevational control of isotopic composition and application in understanding hydrologic processes in the mid Merced River catchment, Sierra Nevada, California, USA. <i>Hydrology and Earth System Sciences</i> , 28(10), 2239-2258. |
| <a href="https://doi.org/10.1007/s11769-024-1437-6">doi.org/10.1007/s11769-024-1437-6</a>   | Ma, Y., Pu, T., Shi, X., Ma, X., Yu, H., 2024. Quantifying the Contribution of Recycled Moisture to Precipitation in Temperate Glacier Region, Southeastern Tibetan Plateau, China. <i>Chin. Geogr. Sci.</i> 34, 764–776.                                                           |
| <a href="https://doi.org/10.1021/es071099d">doi.org/10.1021/es071099d</a>                   | Mark, B.G., & McKenzie, J.M. (2007). Tracing increasing tropical Andean glacier melt with stable isotopes in water. <i>Environmental science &amp; technology</i> , 41 20, 6955-60 .                                                                                                |
| <a href="https://doi.org/10.1007/s12665-018-7849-9">doi.org/10.1007/s12665-018-7849-9</a>   | Maurya, A. S., Rai, S. P., Joshi, N., Dutt, K. S., & Rai, N. (2018). Snowmelt runoff and groundwater discharge in Himalayan rivers: a case study of the Satluj River, NW India. <i>Environmental Earth Sciences</i> , 77, 1-14.                                                     |
| <a href="https://doi.org/10.1007/s10040-009-0558-4">doi.org/10.1007/s10040-009-0558-4</a>   | Mckenzie, J. M., Mark, B. G., Thompson, L. G., Schotterer, U., & Lin, P. N. (2010). A hydrogeochemical survey of Kilimanjaro (Tanzania): implications for water sources and ages. <i>Hydrogeology Journal</i> , 18(4), 985.                                                         |
| <a href="https://doi.org/10.5194/hess-27-1403-2023">doi.org/10.5194/hess-27-1403-2023</a>   | Michelon, A., Ceperley, N., Beria, H., Larsen, J., Vennemann, T., & Schaepli, B. (2023). Hydrodynamics of a high Alpine catchment characterized by four natural tracers. <i>Hydrology and Earth System Sciences</i> , 27(7), 1403-1430.                                             |
| <a href="https://doi.org/10.5194/tc-19-423-2025">doi.org/10.5194/tc-19-423-2025</a>         | Müller, T., Fischer, M., Lane, S. N., & Schaepli, B. (2025). Separating snow and ice melt using water stable isotopes and glacio-hydrological modelling: towards improving the application of isotope analyses in highly glacierized catchments. <i>EGUsphere</i> , 2024, 1-52.     |
| <a href="https://doi.org/10.3389/feart.2023.1129314">doi.org/10.3389/feart.2023.1129314</a> | Munroe, J. S., & Handwerker, A. L. (2023). Examining the variability of rock glacier meltwater in space and time in high-elevation environments of Utah, United States. <i>Frontiers in Earth Science</i> , 11, 1129314.                                                            |
| <a href="https://doi.org/10.3189/S0022143000011266">doi.org/10.3189/S0022143000011266</a>   | Niewodnizański, J., Grabczak, J., Barański, L., & Rzepka, J. (1981). The altitude effect on the isotopic composition of snow in high mountains. <i>Journal of Glaciology</i> , 27(95), 99-111.                                                                                      |
| <a href="https://doi.org/10.1007/BF02719154">doi.org/10.1007/BF02719154</a>                 | Pande, K., Padia, J. T., Ramesh, R., & Sharma, K. K. (2000). Stable isotope systematics of surface water bodies in the Himalayan and Trans-Himalayan (Kashmir) region. <i>Journal of Earth System Science</i> , 109, 109-115.                                                       |
| <a href="https://doi.org/10.1002/hyp.10273">doi.org/10.1002/hyp.10273</a>                   | Penna, D., Engel, M., Mao, L., Dell’Agnese, A., Bertoldi, G., & Comiti, F. (2014). A new method of snowmelt                                                                                                                                                                         |

|                                                                                                       |                                                                                                                                                                                                                                                                                                                                                                                                                                    |
|-------------------------------------------------------------------------------------------------------|------------------------------------------------------------------------------------------------------------------------------------------------------------------------------------------------------------------------------------------------------------------------------------------------------------------------------------------------------------------------------------------------------------------------------------|
|                                                                                                       | sampling for water stable isotopes. <i>Hydrological Processes</i> , 28, 5637–5644.                                                                                                                                                                                                                                                                                                                                                 |
| <a href="https://doi.org/10.1029/2019WR026423">doi.org/10.1029/2019WR026423</a>                       | Pu, T., Wang, K., Kong, Y., Shi, X., Kang, S., Huang, Y., He, Y., Wang, S., Lee, J., Cuntz, M., 2020. Observing and Modeling the Isotopic Evolution of Snow Meltwater on the Southeastern Tibetan Plateau. <i>Water Resour. Res.</i> 56, e2019WR026423.                                                                                                                                                                            |
| <a href="https://doi.org/10.1175/2010JCLI3701.1">doi.org/10.1175/2010JCLI3701.1</a>                   | Purdie, H., Bertler, N., Mackintosh, A., Baker, J. & Rhodes, R. (2010) Isotopic and Elemental Changes in Winter Snow Accumulation on Glaciers in the Southern Alps of New Zealand. <i>Journal of Climate</i> 23, 4737 - 4749.                                                                                                                                                                                                      |
| <a href="https://doi.org/10.1002/wrcr.20370">doi.org/10.1002/wrcr.20370</a>                           | Racoviteanu, A. E., Armstrong, R., & Williams, M. W. (2013). Evaluation of an ice ablation model to estimate the contribution of melting glacier ice to annual discharge in the Nepal Himalaya. <i>Water Resources Research</i> , 49(9), 5117-5133.                                                                                                                                                                                |
| <a href="https://doi.org/10.1007/s12665-016-5417-8">doi.org/10.1007/s12665-016-5417-8</a>             | Rai, S. P., Thayyen, R. J., Purushothaman, P., & Kumar, B. (2016). Isotopic characteristics of cryospheric waters in parts of Western Himalayas, India. <i>Environmental Earth Sciences</i> , 75, 1-9.                                                                                                                                                                                                                             |
| <a href="https://doi.org/10.1016/j.scitotenv.2022.153968">doi.org/10.1016/j.scitotenv.2022.153968</a> | Reato, A., Borzi, G., Martínez, O. A., & Carol, E. (2022). Role of rock glaciers and other high-altitude depositional units in the hydrology of the mountain watersheds of the Northern Patagonian Andes. <i>Science of the Total Environment</i> , 824, 153969                                                                                                                                                                    |
| <a href="https://doi.org/10.3402/tellusb.v68.30397">doi.org/10.3402/tellusb.v68.30397</a>             | Ren, W., Yao, T., & Xie, S. (2016). Water stable isotopes in the Yarlungzangbo headwater region and its vicinity of the southwestern Tibetan Plateau. <i>Tellus B: Chemical and Physical Meteorology</i> , 68(1), 30397.                                                                                                                                                                                                           |
| <a href="https://doi.org/10.5194/essd-11-1463-2019">doi.org/10.5194/essd-11-1463-2019</a>             | Rets, E. P., Popovnin, V. V., Toropov, P. A., Smirnov, A. M., Tokarev, I. V., Chizhova, J. N., ... & Kornilova, E. D. (2019). Djankuat glacier station in the North Caucasus, Russia: a database of glaciological, hydrological, and meteorological observations and stable isotope sampling results during 2007–2017. <i>Earth System Science Data</i> , 11(3), 1463-1481.                                                        |
| <a href="https://doi.org/10.5194/hess-23-405-2019">doi.org/10.5194/hess-23-405-2019</a>               | Saberi, L., McLaughlin, R. T., Ng, G. H. C., La Frenierre, J., Wickert, A. D., Baraer, M., ... & Mark, B. G. (2019). Multi-scale temporal variability in meltwater contributions in a tropical glacierized watershed. <i>Hydrology and Earth System Sciences</i> , 23(1), 405-425.                                                                                                                                                 |
| <a href="https://doi.org/10.1038/s44221-022-00001-4">doi.org/10.1038/s44221-022-00001-4</a>           | Schilling, O. S., Nagaosa, K., Schilling, T. U., Brennwald, M. S., Sohrin, R., Tomonaga, Y., ... & Kato, K. (2023). Revisiting Mt Fuji's groundwater origins with helium, vanadium and environmental DNA tracers. <i>Nature Water</i> , 1(1), 60-73. Schilling, O., Nagaosa, K., Schilling, T., Brennwald, M., Sohrin, R., Tomonaga, Y., ... & Kato, K. (2022). Mt. Fuji hydrogeochemical and microbiological dataset. (No Title). |

|                                         |                                                                                                                                                                                                                                                                                            |
|-----------------------------------------|--------------------------------------------------------------------------------------------------------------------------------------------------------------------------------------------------------------------------------------------------------------------------------------------|
| doi.org/10.1029/2019JD031751            | Shi, X., Risi, C., Pu, T., Lacour, J.-L., Kong, Y., Wang, K., He, Y., Xia, D., 2020. Variability of Isotope Composition of Precipitation in the Southeastern Tibetan Plateau from the Synoptic to Seasonal Time Scale. <i>J. Geophys. Res.-Atmos.</i> 125, e2019JD031751.                  |
| doi.org/10.1080/10256016.2020.1814278   | Sileo, N. R., Dapeña, C., & Trombotto Liaudat, D. (2020). Isotopic composition and hydrogeochemistry of a periglacial Andean catchment and its relevance in the knowledge of water resources in mountainous areas. <i>Isotopes in Environmental and Health Studies</i> , 56(5-6), 480-494. |
| doi.org/10.3390/w11112242               | Singh, A. T., Rahaman, W., Sharma, P., Laluraj, C. M., Patel, L. K., Pratap, B., ... & Thamban, M. (2019). Moisture sources for precipitation and hydrograph components of the Sutri Dhaka Glacier Basin, Western Himalayas. <i>Water</i> , 11(11), 2242.                                  |
| doi.org/10.1080/10256010600839707       | Strauch, G., Oyarzun, J., Fiebig-Wittmaack, M., González, E., & Weise, S. M. (2006). Contributions of the different water sources to the Elqui river runoff (northern Chile) evaluated by H/O isotopes. <i>Isotopes in Environmental and Health Studies</i> , 42(3), 303-322.              |
| doi.org/10.1007/s12665-016-5314-1       | Sun, C., Yang, J., Chen, Y., Li, X., Yang, Y., Zhang, Y., 2016. Comparative study of streamflow components in two inland rivers in the Tianshan Mountains, Northwest China. <i>Environ. Earth Sci.</i> 75, 727.                                                                            |
| doi.org/10.1029/2000WR900341            | Taylor, S., Feng, X., Kirchner, J. W., Osterhuber, R., Klaue, B., & Renshaw, C. (2001). Isotopic evolution of a seasonal snowpack and its melt. <i>Water Resources Research</i> , 37, 759–769.                                                                                             |
| doi.org/10.1155/2016/6791278            | Wang, J., Han, H., Zhao, Q., & Zhang, X. (2016). Hydrochemical denudation and transient carbon dioxide drawdown in the highly glacierized, shrinking Koxkar basin, China. <i>Advances in Meteorology</i> , 2016(1), 6791278.                                                               |
| doi.org/10.5194/tc-16-5023-2022         | Wang, S., He, X., Kang, S., Fu, H., Hong, X., 2022. Estimation of stream water components and residence time in a permafrost catchment in the central Tibetan Plateau using long-term water stable isotopic data. <i>Cryosphere</i> 16, 5023–5040.                                         |
| doi.org/10.1016/j.apgeochem.2024.105909 | Wang, K., Kong, Y., Pu, T., Shi, X., Pang, Z., 2024. Seasonal variations of a glacier river runoff components as relative to changes of air temperature and precipitation in southeast Tibetan Plateau. <i>Appl. Geochem.</i> 162, 105909.                                                 |
| doi.org/10.1002/hyp.14963               | Wanner, P., Zischg, A., & Wanner, C. (2023). Quantifying the glacial meltwater contribution to mountainous streams using stable water isotopes: What are the opportunities and limitations?. <i>Hydrological Processes</i> , 37(9), e14963.                                                |

[doi.org/10.1007/978-3-642-23462-0](https://doi.org/10.1007/978-3-642-23462-0)

Woo, M.-K. (2012). *Permafrost Hydrology*. Springer.
